# Supplementary material for: Transcriptome Analysis of Eggplant under Salt Stress: AP2/ERF Transcription Factor SmERF1 Acts as a Positive Regulator of Salt Stress
Source: MDPI journal article supplement (doi:10.3390/plants11172205), 2022-08-25

a

|                 |                                                                                                                             |     |
|-----------------|-----------------------------------------------------------------------------------------------------------------------------|-----|
| <i>SmERF1</i>   | .....MDQPISTELPPMNFPGDLEVYVNSSESRIPCLTETGA..LPLKVLSEDVYVGLKIFALSAGS.....                                                    | 66  |
| <i>SIERF1</i>   | .....MDQ.....QLLPTNFF.....VYVNSSESRIPCLTETGA..LPLKVLSEDVYVGLKIFALNVGHS.....                                                 | 58  |
| <i>NIERF1</i>   | .....MNQPISTELPPANFFGDFYVNSSESRIPCLTETGE..LPLKVLSEDVYVGLKIFALNVGHS.....                                                     | 66  |
| <i>SIERFA.2</i> | .....MYGLPTSTELTFEFA..EFYVYVNSSESRIPCLTETGS..LPLKVLSEDVYVGLKIFALSAGT.....                                                   | 65  |
| <i>AcERF2</i>   | .....MYGQCETPVIFFASSSEFEFYVNSSESRIPCLTETGE..LPLKVLSEDVYVGLKIFALNVGHS.....                                                   | 67  |
| <i>CaERF1</i>   | .....MNQPISTELPPNFF.....VYVNSSESRIPCLTETGA..LPLKVLSEDVYVGLKIFALNVGHS.....                                                   | 80  |
| <i>GhERF2</i>   | MEMYSTANESDLAMLDSIRCYLLSDSSDLRLTASTDFTSAP.....EMFCSSSESRIPYECITETGD..LPLKEDSEDVYVGLKIFALNVGHS.....                          | 89  |
| <i>ZmERF2</i>   | .....MLNLFACEAAAFMDISRHHLLDEFAAAATAAFA..FYVNSSESRIPCLTETGS..LPLKVLSEDVYVGLKIFALNVGHS.....                                   | 82  |
| <i>AtERF1A</i>  | .....GOSIK.....FYVNSSESRIPYECITETGS..LPLKEDSEDVYVGLKIFALNVGHS.....                                                          | 53  |
| <i>OsERF1</i>   | .....MLNLPASREVAALDSIRHHLLDEEETPATAPATRRVYVNSSESRIPCLTETGS..LPLKVLSEDVYVGLKIFALNVGHS.....                                   | 84  |
| Consensus       | .....r s f l w l p d d m l a g w                                                                                            |     |
| AP2 domain      |                                                                                                                             |     |
| <i>SmERF1</i>   | .....PENFTAG.....EVKSEPEEEIESA.....PELVPSFAVMAAF.....LPPRGGRGVGRVGRFWGKFAAEIRDPKNGARVWLGTETAEADAA                           | 144 |
| <i>SIERF1</i>   | .....PFSFTTG.....EVKSEPEEEIESA.....PEFVPSFAETIAAFV.....LPTPRGRGVGRVGRFWGKFAAEIRDPKNGARVWLGTETAEADAA                         | 139 |
| <i>NIERF1</i>   | .....PENFTAG.....EVKSELMEE.....EIVVSPADTTAAFA.....LPLPRGRGVGRVGRFWGKFAAEIRDPKNGARVWLGTETAEADAA                              | 142 |
| <i>SIERFA.2</i> | .....PSENLTSE.....EVKLEPEEEIEP.....AMSTVSPPITVAF.....AALCPGRGVGRVGRFWGKFAAEIRDPKNGARVWLGTETAEADAA                           | 144 |
| <i>AcERF2</i>   | .....PENLTAN.....DVKPEPIDEFEP.....ATTISAGQLVESSEVTEVQTIAAARPPGRGRGVGRVGRFWGKFAAEIRDPKNGARVWLGTETAEADAA                      | 154 |
| <i>CaERF1</i>   | EPTASPAKERYRGGVGFSEFTAG.....EVKSKPAPELMTLTADATVVPMLPASAEITKAA.....LALKDRGRGVGRVGRFWGKFAAEIRDPKNGARVWLGTETAEADAA             | 184 |
| <i>GhERF2</i>   | .....PSDNST.....TNFALIKPE.PQEFLEQTS.....VEKMDTAERTVPA.....VVPARGGRGVGRVGRFWGKFAAEIRDPKNGARVWLGTETAEADAA                     | 173 |
| <i>ZmERF2</i>   | .....DGSFAAVKFEFLAFDPSFYERGSPYCLGFFLLAEGPTEPTETATTPGSEE.....EAAAVSRGRGVGRVGRFWGKFAAEIRDPKNGARVWLGTETAEADAA                  | 181 |
| <i>AtERF1A</i>  | .....BSSSSDEDRSFFSVRIETPFESFAAVDS.....VVPVKKETSPVSA.....VTIARGGRGVGRVGRFWGKFAAEIRDPKNGARVWLGTETAEADAA                       | 142 |
| <i>OsERF1</i>   | .....DGSFAAVKFEQDSYDGSIGSGLASSSSSEAGTGPETVSTETATVTGIREG.EGEAVASRGGRGVGRVGRFWGKFAAEIRDPKNGARVWLGTETAEADAA                    | 186 |
| Consensus       | .....h r g v r l p w g k f a a e i r d p a k n g a r v w l g t a a                                                          |     |
| <i>SmERF1</i>   | .....LAYDCAAMRVGRSKALNFFHRRIGLNEEFPVRVTAR.....RRAS.....PELAT.....SSSENGSEPRRRKAVRK.....CDVEVESKSS.VMVGCGCIEQLTR.....GHQILV  | 235 |
| <i>SIERF1</i>   | .....LAYDCAAMRVGRSKALNFFHRRIGLNEEFPVRVTAR.....RRAS.....PE.PV.....SSSENGSEPRRRKAVRK.....CDGVEVESRSS.VMVGCGCIEQLTG.....VHQILV | 229 |
| <i>NIERF1</i>   | .....LAYDCAAMRVGRSKALNFFHRRIGLNEEFPVRVTAR.....RRAS.....PE.PA.....SSSENGSEPRRRKAVRK.....GAVEVESKSN.VLVCVCQVEILLR.....GHQILV  | 235 |
| <i>SIERFA.2</i> | .....LAYDCAAMRVGRSKALNFFHRRIGLNEEFPVRVTAR.....RRAS.....ESASSSVSASESGSEPRRRKGV.VAAKQ.AELDEVESRGENVMVGCGCIEQFV.....GEQILV     | 241 |
| <i>AcERF2</i>   | .....LAYDCAAMRVGRSKALNFFHRRIGLNEEFPVRVTAR.....RRSP.....EPTS.....PSSESGSEPRRRKGVFAAKQ.AELGV.ESSVCVCQVEILLV.....GEQILV        | 247 |
| <i>CaERF1</i>   | .....LAYDCAAMRVGRSKALNFFHRRIGLNEEFPVRVTAR.....RRVL.....HE.RD.....SPLNDLARRRGENGV.....EKCESSR.....SVEQLTG.....GEQILV         | 265 |
| <i>GhERF2</i>   | .....LAYDCAAMRVGRSKALNFFHRRIGLNEEFPVRVTAR.....RSSP.....EP.....SSSGSENASEPRRRKGVFAAGVHAGLIVGAG..LDENVYKVTSCAR.....GEQILV     | 267 |
| <i>ZmERF2</i>   | .....LAYDCAAMRVGRSKALNFFHRRIGLNEEFPVRVTAR.....EPTASSDSPPASSATPRRRKGVFAAATMAMALVFPFPP..AACGAFVQLTLPARPFWAAGPVCGV             | 293 |
| <i>AtERF1A</i>  | .....LAYDCAAMRVGRSKALNFFHRRIGLNEEFPVRVTAR.....RSS.....FSSSNGEAPRRRTVAAGG.....GMPKGL.....TVKCEVPEAR.....GDRILV               | 224 |
| <i>OsERF1</i>   | .....LAYDCAAMRVGRSKALNFFHRRIGLNEEFPVRVTAR.....SSSGSSSSSSSSSGSGSEPRRRKGVFAAASPMAMALVFPFPP.FACGAFVQLALGAPFWAAGPVCGV           | 302 |
| Consensus       | ayd aa r rg a l n p k                                                                                                       | lv  |

b

c

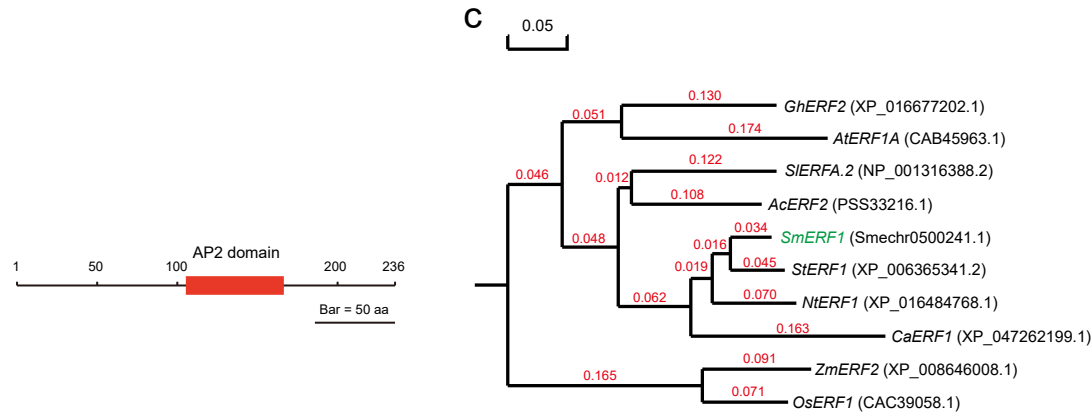

d

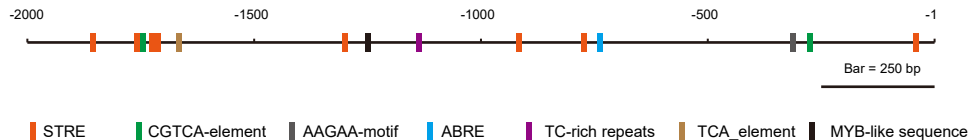

Supplement: s1 [file s1]
