# Supplementary material for: Transcriptome Analysis of Eggplant under Salt Stress: AP2/ERF Transcription Factor SmERF1 Acts as a Positive Regulator of Salt Stress
Source: MDPI journal article supplement (doi:10.3390/plants11172205), 2022-08-25
Supplement: s1 [file s1]

Table S5. Primers used in this study

| Primers used for qRT-PCR assay       |               |                                                             |                                                            |
|--------------------------------------|---------------|-------------------------------------------------------------|------------------------------------------------------------|
| Gene name                            | Gene ID       | Forward primer (5'→3')                                      | Reverse primer (5'→3')                                     |
| <i>SmActin</i>                       | Smechr1100649 | TTCCCTTCTTCCCACTAAAGC                                       | AATCTCTCCCTTCTTTCATAGCC                                    |
| <i>SmERF1</i>                        | Smechr0500241 | CTAGCTCGTCGGAAAACGGT                                        | ATAGCTGATGGCCACGTGTC                                       |
| <i>SmMAPKKK1</i>                     | Smechr0701976 | TGCTTACTCGCCAGTTTCCT                                        | TCAACCGAAAGGGTATCAGG                                       |
| <i>SmWRKY20</i>                      | Smechr0701744 | CTGTTGTGTCAGCTGGTGGT                                        | CTTCGGAGGTGGACTCATGT                                       |
| <i>SmCDPK32</i>                      | Smechr1002846 | AAACGAGGAGCACCTGAAGA                                        | TTCTTCGCTGTTGGTTTCAA                                       |
| <i>SmCNGC17</i>                      | Smechr0700014 | ATCTTGACGACTGGAATCA                                         | TAGGGGACGGATTGAGCTA                                        |
| <i>SmHSP90-5</i>                     | Smechr1001880 | GAGATGATGGCAATGGCTCT                                        | TCTTGGACTTCAGCGGAGTT                                       |
| <i>SmRIN1</i>                        | Smechr0800184 | TCACCGAGCTGCATAATCTG                                        | CTTCACCTTCCACAGCTTGC                                       |
| <i>SmCDPK11</i>                      | Smechr1200644 | CTCTTGGGCCAGTGATAGT                                         | AGCCAACTAGGTGGGCTTCT                                       |
| <i>SmGSTU10</i>                      | Smechr0303072 | GGGTGACCACTCTGCTTGAG                                        | TGAAACGTAAAGCCATTTTGC                                      |
| <i>SmABA8'HO3</i>                    | Smechr0401604 | CCTGGTCCGAAGTCAACAAT                                        | TTGATTTTGCACCCCTCAAT                                       |
| <i>SmDHN1</i>                        | Smechr0200704 | CAACTCATGCTGCACAAACA                                        | CAATTCATGCCAGGGATCTT                                       |
| <i>SmDHNX1</i>                       | Smechr0200676 | TCCTGCTCCTACTCCTGCTC                                        | GCATCCCAGTGATCTTTTCC                                       |
| <i>SmTAS14</i>                       | Smechr0202316 | GGACAGCAGGAAGGTGGATA                                        | TCATTCCAGGGATCTTGTCC                                       |
| Primers used for vector construction |               |                                                             |                                                            |
| <i>SmERF1</i> -TOE                   | Smechr0500241 | CTGTACAAGGGTACCCCC<br>GGGATGGATCAACCAATTT<br>CTACCGA        | AGAGGATCCGTCGACCCCGG<br>GTAACTGACCAATAGCTGAT<br>GGCC       |
| <i>SmERF1</i> -VIGS                  | Smechr0500241 | GGGGACAAGTTTGTACAAA<br>AAAGCAGGCTTCATGGATC<br>AACCAATTTCTAC | GGGGACCACTTTGTACAAGA<br>AAGCTGGGTCCGGAGCTGCC<br>ATAGTCACCG |

*SmERF1*-TOE means the primers used for vector construction of *SmERF1* transient overexpression;

*SmERF1*-VIGS means the primers used for vector construction of *SmERF1* silencing.
