# Supplementary figures and images for: Transcriptome Analysis of Eggplant under Salt Stress: AP2/ERF Transcription Factor SmERF1 Acts as a Positive Regulator of Salt Stress
Source: MDPI journal article supplement (doi:10.3390/plants11172205), 2022-08-25

a

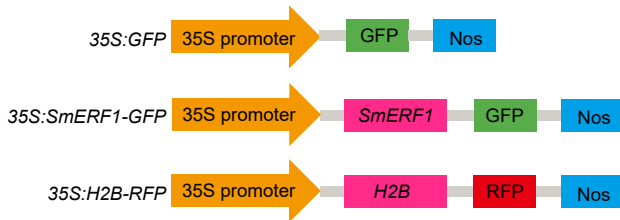

b

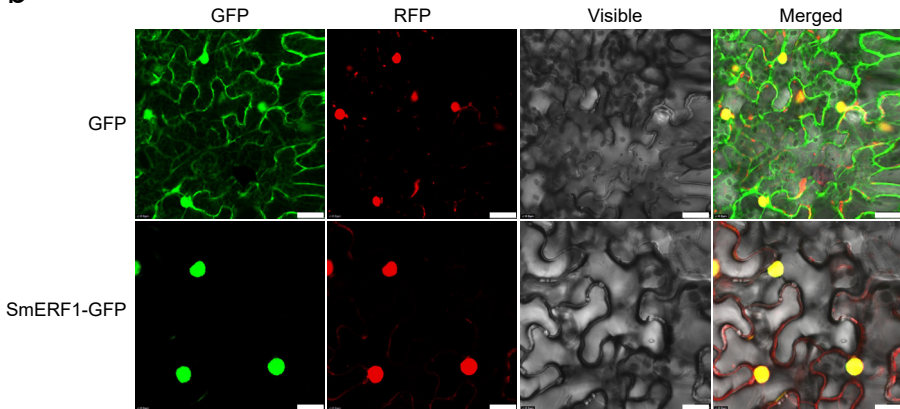

Supplement: s1 [file s1]
